# Supplementary material for: Predicting radiofrequency thermocoagulation surgical outcomes in refractory focal epilepsy patients using functional coupled neural mass model
Source: Front Neurol. 2024 Aug 23;15:1402004. doi: 10.3389/fneur.2024.1402004 (PMC11377261; doi:10.3389/fneur.2024.1402004)
Supplement: Supplementary file 1 [file Table_1.DOCX]

Supplementary Material

**Supplementary** Table 1. The physiological interpretations and standard values of parameters in the Wendling’s model (39).

| Parameter | Physiological interpretation | Standard value |
| --- | --- | --- |
|  | Average excitatory synaptic gain | 4.0 mV |
|  | Average slow dendritic inhibitory synaptic gain | 40 mV |
|  | Average fast somatic inhibitory gain | 20 mV |
|  | Dendritic average time constant in the feedback excitatory loop | 100 s-1 |
|  | Dendritic average time constant in the slow feedback inhibitory loop | 50 s-1 |
|  | Somatic average time constant in the fast feedback inhibitory loop | 350 s-1 |
|  | Average number of synaptic contacts in the excitatory feedback loop | , |
|  | Average number of synaptic contacts in the slow feedback inhibitory loop |  |
|  | Average number of synaptic contacts in the fast feedback inhibitory loop | , |
|  | Average number of synaptic contacts between slow and fast inhibitory interneurons | , |
|  | Parameters of the sigmoid function | mV, s-1, mV-1 |
|  | Mean and standard deviation of white noise input | pulses/s,  pulses/s |
